# Supplementary material for: Using a 24 h Activity Recall (STAR-24) to Describe Activity in Adolescent Boys in New Zealand: Comparisons between a Sample Collected before, and a Sample Collected during the COVID-19 Lockdown
Source: Int J Environ Res Public Health. 2021 Jul 29;18(15):8035. doi: 10.3390/ijerph18158035 (PMC8345423; doi:10.3390/ijerph18158035)
Supplement: Supplementary file 1 [file ijerph-18-08035-s001.zip › ijerph-1287121-supplementary.pdf]

**Supplementary Table S1:** Coding of possible activity reported in STAR-24

| Number | Activity                                                                                                                                                                                                                                                                                                                                                                                                                                      |
|--------|-----------------------------------------------------------------------------------------------------------------------------------------------------------------------------------------------------------------------------------------------------------------------------------------------------------------------------------------------------------------------------------------------------------------------------------------------|
| 1      | Sleeping                                                                                                                                                                                                                                                                                                                                                                                                                                      |
| 2      | Activities of daily living <ul style="list-style-type: none"> <li>• Showering, Bathing</li> <li>• Getting dressed, getting ready or school, pottering around</li> <li>• Meal preparation</li> <li>• House work (cleaning, vacuuming, doing laundry etc)</li> </ul>                                                                                                                                                                            |
| 3      | Driving a car or riding in a car/bus/train/escooter                                                                                                                                                                                                                                                                                                                                                                                           |
| 4      | Active Travel <ul style="list-style-type: none"> <li>• Travelling by bike</li> <li>• Walking to school/work etc</li> <li>• Skateboarding/scootering for travel purposes</li> </ul>                                                                                                                                                                                                                                                            |
| 5      | At school                                                                                                                                                                                                                                                                                                                                                                                                                                     |
| 6      | Active PE class                                                                                                                                                                                                                                                                                                                                                                                                                               |
| 7      | Work/job<br>Home work                                                                                                                                                                                                                                                                                                                                                                                                                         |
| 8      | General every day activities <ul style="list-style-type: none"> <li>• Including hanging out with friends/family</li> <li>• Playing/practicing musical instrument</li> <li>• Listening to music</li> <li>• Reading</li> </ul>                                                                                                                                                                                                                  |
| 9      | Watching TV/Movies/streaming video content<br>General internet use (google/social media/chat/other)                                                                                                                                                                                                                                                                                                                                           |
| 10     | Gaming <ul style="list-style-type: none"> <li>• PC</li> <li>• Playstation</li> <li>• Xbox</li> <li>• Switch</li> <li>• Mobile etc</li> </ul>                                                                                                                                                                                                                                                                                                  |
| 11     | Physical Activity (not organised sport) <ul style="list-style-type: none"> <li>• Walking/running for exercise</li> <li>• Dancing/aerobics</li> <li>• Swimming</li> <li>• Riding a bike</li> <li>• Resistance exercise (going to the gym, lifting weights, cross fit, F45, tribe etc)</li> <li>• Skateboard/scooter</li> <li>• Pilates/yoga</li> <li>• Playing active game/throwing the ball around/mucking around but being active</li> </ul> |
| 12     | Play or training for organised sport (rugby/football/basketball/netball/cricket/golf etc) <ul style="list-style-type: none"> <li>• Includes competitive gymnastics, track and field etc</li> </ul>                                                                                                                                                                                                                                            |
| 13     | Other (please specify)                                                                                                                                                                                                                                                                                                                                                                                                                        |

**Supplementary Table S2:** Coding of possible intensities reported in STAR-24

| Number | Intensity                                                                                                 |
|--------|-----------------------------------------------------------------------------------------------------------|
| 1      | Very light intensity (activities that involved little or no movement, breathing rate is slow)             |
| 2      | Light intensity (activities that involve some movement, but do not elevate breathing rate)                |
| 3      | Medium intensity activity (moving quickly/briskly, breathing rate is increased but you can still talk)    |
| 4      | Hard/vigorous intensity activity (moving very quickly, breathing so hard you can't talk at the same time) |

**Supplementary Table S3.** Median (25<sup>th</sup>, 75<sup>th</sup>) percentiles of 24-hour time-use (n=109)

|                               | Full sample                                                      | Those who did the behaviour |                                                                  |
|-------------------------------|------------------------------------------------------------------|-----------------------------|------------------------------------------------------------------|
|                               | Median (25 <sup>th</sup> , 75 <sup>th</sup> percentiles) minutes | n                           | Median (25 <sup>th</sup> , 75 <sup>th</sup> percentiles) minutes |
| <b>Activities<sup>a</sup></b> |                                                                  |                             |                                                                  |
| Sleep                         | 555 (510, 600)                                                   | 109                         | 555 (510, 600)                                                   |
| General                       | 225 (180, 300)                                                   | 109                         | 225 (180, 300)                                                   |
| Transport                     | 0 (0, 45)                                                        | 54                          | 45 (30, 90)                                                      |
| School/work                   | 180 (105, 330)                                                   | 92                          | 195 (150, 338)                                                   |
| Activity                      | 75 (45, 135)                                                     | 99                          | 75 (45, 135)                                                     |
| Screens                       | 135 (75, 255)                                                    | 98                          | 150 (90, 270)                                                    |
| Gaming                        | 30 (0, 120)                                                      | 60                          | 90 (60, 225)                                                     |
| <b>Screens<sup>b</sup></b>    |                                                                  |                             |                                                                  |
| No screen                     | 405 (285, 540)                                                   | 109                         | 405 (285, 540)                                                   |
| Phone                         | 90 (45, 210)                                                     | 100                         | 113 (45, 233)                                                    |
| TV                            | 30 (0, 105)                                                      | 65                          | 90 (45, 165)                                                     |
| Computer                      | 210 (45, 405)                                                    | 94                          | 240 (120, 435)                                                   |
| Tablet                        | 0 (0, 0)                                                         | 4                           | 150 (83, 270)                                                    |
| <b>Intensity<sup>c</sup></b>  |                                                                  |                             |                                                                  |
| Very light                    | 645 (510, 780)                                                   | 104                         | 660 (525, 780)                                                   |
| Light                         | 135 (60, 285)                                                    | 94                          | 165 (75, 330)                                                    |
| Medium                        | 30 (0, 60)                                                       | 76                          | 45 (30, 90)                                                      |
| Hard/vigorous                 | 0 (0, 30)                                                        | 50                          | 30 (15, 60)                                                      |
| <b>Posture</b>                |                                                                  |                             |                                                                  |
| Lying/reclining               | 615 (555, 675)                                                   | 109                         | 615 (555, 675)                                                   |
| Sitting                       | 600 (495, 705)                                                   | 109                         | 600 (495, 705)                                                   |
| Standing                      | 45 (30, 90)                                                      | 94                          | 60 (30, 90)                                                      |
| Stepping/moving               | 120 (60, 210)                                                    | 104                         | 128 (68, 218)                                                    |

<sup>a</sup> ‘General’ included activities of daily living; ‘Transport’ included car/bus/train/e-scooter; ‘Activity’ included active transport, PE, sport, or other physical activity; ‘Screens’ included TV, computers, phones, not including gaming; and ‘Gaming’ included games played on PC, playstation, Xbox, Switch, mobile etc.

<sup>b</sup> If multiple screens in use then the one they were interacting with most was prioritised.

<sup>c</sup> Very light intensity described as: activities that involve very little or no movement, breathing rate is slow; Light intensity described as: activities that involved some movement, but do not elevate breathing rate; Medium intensity described as: moving quickly/briskly, breathing rate is increased but you can still talk; Hard/vigorous intensity described as: moving very quickly, breathing so hard you can't talk at the same time.
